# Supplementary material for: Stereochemical Determination of Hydroxylated Derivatives of Progesterone by Quantum NMR Calculations
Source: Research Square preprint supplement (doi:10.21203/rs.3.rs-7472727/v1), 2025-10-06
Supplement: Supplementary file 2 [file d5e67c5fe5e8bcc18ba8b001.docx]

**Table 1**. Experimental and calculated 1H and 13C NMR chemical shifts (ppm) for all possible diastereoisomer of prog-15-OH and prog-7,15-di-OH.

|  | prog-15-OH | | | prog-7,15-di-OH | | | | | |
| --- | --- | --- | --- | --- | --- | --- | --- | --- | --- |
| **Atom** | **Expa** | **Calc** | | **Expa** | **Calc** | | | | |
|  | **1H** | **15β-OH** | **15α-OH** | **1H** | **7β,15β-di-OH** | **7β,15α-di-OH** | **7α,15β-di-OH** | **7α,15α-di-OH** | |
| 1α | 1.75 | 1.75 | 1.71 | 1.68 | 1.50 | 1.59 | 1.53 | 1.78 | |
| 1β | 2.06 | 2.02 | 1.94 | 2.04 | 1.91 | 2.06 | 1.89 | 1.96 | |
| 2α | 2.31 | 2.25 | 2.14 | 2.38 | 2.04 | 2.26 | 2.10 | 2.15 | |
| 2β | 2.43 | 2.50 | 2.35 | 2.44 | 2.44 | 2.59 | 2.40 | 2.29 | |
| 4 | 5.76 | 6.01 | 5.77 | 5.77 | 5.66 | 5.94 | 5.48 | 5.51 | |
| 6α | 2.38 | 2.37 | 2.28 | 2.55 | 2.40 | 2.43 | 2.22 | 2.07 | |
| 6β | 2.49 | 2.69 | 2.49 | 2.55 | 2.83 | 3.05 | 2.57 | 2.67 | |
| 7α | 1.14 | 1.23 | 1.13 | 3.63 | 4.01 | 4.60 | 3.52 | 4.06 | |
| 7β | 2.15 | 2.09 | 2.29 | - | - | - | - | - | |
| 8β | 1.96 | 2.09 | 1.81 | 2.04 | 2.02 | 2.23 | 1.70 | 1.73 | |
| 9α | 1.05 | 0.98 | 0.97 | 1.06 | 1.12 | 1.45 | 1.09 | 1.62 | |
| 11α | 1.68 | 1.59 | 1.57 | 1.70 | 1.40 | 1.61 | 1.54 | 1.56 | |
| 11β | 1.52 | 1.57 | 1.50 | 1.51 | 1.66 | 1.86 | 1.47 | 1.52 | |
| 12α | 1.46 | 1.37 | 1.43 | 1.40 | 1.08 | 1.78 | 1.48 | 1.63 | |
| 12β | 2.06 | 1.96 | 1.86 | 2.04 | 2.29 | 2.04 | 1.82 | 1.83 | |
| 14α | 1.05 | 0.88 | 0.91 | 1.16 | 0.97 | 1.67 | 1.24 | 1.77 | |
| 15α | 4.33 | 4.34 | 4.11 | 4.46 | 4.48 | 4.77 | 4.24 | 4.07 | |
| 16α | 2.24 | 2.11 | 1.16 | 2.35 | 2.74 | 1.98 | 1.53 | 1.25 | |
| 16β | 2.24 | 2.50 | 2.93 | 2.26 | 2.05 | 2.33 | 2.88 | 2.69 | |
| 17α | 2.49 | 2.27 | 2.46 | 2.44 | 2.13 | 2.96 | 2.63 | 2.94 | |
| 18 | 0.94 | 0.98 | 0.74 | 0.96 | 1.08 | 1.00 | 0.71 | 0.64 | |
| 19 | 1.22 | 1.30 | 1.26 | 1.25 | 1.34 | 1.37 | 1.19 | 1.30 | |
| 21 | 2.15 | 2.18 | 2.08 | 2.16 | 2.20 | 2.27 | 2.09 | 2.09 | |
|  | **Expb** | **Calc** | | **Expb** | **Calc** | | | | |
| **Atom** | **13C** | **15β-OH** | **15α-OH** | **13C** | **7β,15β-di-OH** | **7β,15α-di-OH** | **7α,15β-di-OH** | **7α,15α-di-OH** | |
| 1 | 35.8 | 41.0 | 41.3 | 35.6 | 40.1 | 39.7 | 38.0 | 37.7 |
| 2 | 33.9 | 38.8 | 38.7 | 33.9 | 39.0 | 39.0 | 36.7 | 35.9 |
| 3 | 199.4 | 208.4 | 208.1 | 199.4 | 208.4 | 208.9 | 194.8 | 194.5 |
| 4 | 123.9 | 130.3 | 130.0 | 124.8 | 129.9 | 134.5 | 123.1 | 124.2 |
| 5 | 170.9 | 186.6 | 186.8 | 167.2 | 182.8 | 181.7 | 170.5 | 169.5 |
| 6 | 32.8 | 38.6 | 38.9 | 42.6 | 49.7 | 46.5 | 45.2 | 43.0 |
| 7 | 31.0 | 37.6 | 38.6 | 74.0 | 82.7 | 77.0 | 75.7 | 71.8 |
| 8 | 31.6 | 37.8 | 41.9 | 38.7 | 43.0 | 43.5 | 45.0 | 39.9 |
| 9 | 53.7 | 59.4 | 58.8 | 50.9 | 56.4 | 57.9 | 53.5 | 49.5 |
| 10 | 38.7 | 46.7 | 46.6 | 38.0 | 44.8 | 45.5 | 42.3 | 42.9 |
| 11 | 20.9 | 24.7 | 24.6 | 20.9 | 25.3 | 26.7 | 23.8 | 24.7 |
| 12 | 40.2 | 45.7 | 44.4 | 39.6 | 42.0 | 46.2 | 41.1 | 41.3 |
| 13 | 43.9 | 49.8 | 50.9 | 43.9 | 51.9 | 51.8 | 50.1 | 50.6 |
| 14 | 60.4 | 66.1 | 68.4 | 60.2 | 64.0 | 58.8 | 63.9 | 60.1 |
| 15 | 70.2 | 77.4 | 80.5 | 71.5 | 78.3 | 79.0 | 73.5 | 72.9 |
| 16 | 36.2 | 41.7 | 42.1 | 33.9 | 40.7 | 42.9 | 38.2 | 37.9 |
| 17 | 63.5 | 70.2 | 67.7 | 63.3 | 68.8 | 69.1 | 62.5 | 61.8 |
| 18 | 15.9 | 17.2 | 17.0 | 15.6 | 14.7 | 17.7 | 15.9 | 15.8 |
| 19 | 17.9 | 19.0 | 19.2 | 17.3 | 19.0 | 19.6 | 17.9 | 19.0 |
| 20 | 209.3 | 219.9 | 220.4 | 208.6 | 222.2 | 221.2 | 207.5 | 205.8 |
| 21 | 31.4 | 34.8 | 35.5 | 31.4 | 32.5 | 34.4 | 33.1 | 33.2 |
