# Supplementary material for: Stereochemical Determination of Hydroxylated Derivatives of Progesterone by Quantum NMR Calculations
Source: Research Square preprint supplement (doi:10.21203/rs.3.rs-7472727/v1), 2025-10-06
Supplement: Supplementary file 3 [file ef605746c0801af876758ab7.docx]

**Table 2**. Parameters R2, MAE and RMSE and DP4+ and DP5 probability for isotropic shielding values for all possible diastereoisomers of prog-15-OH and prog-7,15-di-OH.

|  |  | **prog-15-OH** | | **prog-7,15-OH** | | | |
| --- | --- | --- | --- | --- | --- | --- | --- |
|  |  | **15β-OH** | **15α-OH** | **7β,15β-di-OH** | **7β,15α-di-OH** | **7α,15β-di-OH** | **7α,15α-di-OH** |
| 1H | R2 | 0.997 | 0.924 | 0.998 | 0.905 | 0.935 | 0.873 |
| MAD | 0.098 | 0.162 | 0.184 | 0.254 | 0.207 | 0.308 |
| RMSD | 0.123 | 0.289 | 0.219 | 0.339 | 0.282 | 0.393 |
| 13C | R2 | 0.996 | 0.983 | 0.999 | 0.979 | 0.995 | 0.997 |
| MAD | 6.219 | 6.614 | 2.650 | 4.025 | 2.815 | 2.245 |
| RMSD | 6.912 | 7.414 | 3.513 | 4.782 | 3.259 | 3.820 |
|  | DP4+ | 100.0% | 0.00% | 99.80% | 0.20% | 0.00% | 0.00% |
